# Supplementary material for: Clinical and Wear Analyses of 9 Large Metal-on-Metal Total Hip Prostheses
Source: PubMed Central journal article supplement (PMC5053776; doi:10.1371/journal.pone.0163438), 2016-10-06
Supplement: pone.0163438.s001.pdf [file pone.0163438.s001.pdf]

## Harris Hip Score

|                                                                                                                                                                         |                                         |          |       |
|-------------------------------------------------------------------------------------------------------------------------------------------------------------------------|-----------------------------------------|----------|-------|
| <b>I. Pain (44 points possible)</b>                                                                                                                                     |                                         |          |       |
| A. None                                                                                                                                                                 |                                         | 44       |       |
| B. Slight, occasional, no compromise in activities                                                                                                                      | 40                                      |          |       |
| C. Mild pain, no effect on common activities, rarely moderate pain with unusual activity, may take simple pain medication                                               | 30                                      |          |       |
| D. Moderate pain, tolerable, accepts limitations caused by pain. Some limitation of common activities or work. Occasionally takes pain medication stronger than aspirin | 20                                      |          |       |
| E. Pronounced, serious limitation of activities                                                                                                                         | 10                                      |          |       |
| F. Totally disabled, crippled, pain in bed, bedridden                                                                                                                   | 00                                      |          |       |
| <b>II Function (47 points possible)</b>                                                                                                                                 |                                         |          |       |
| A. Gait (33 possible)                                                                                                                                                   |                                         |          |       |
| 1. Limp                                                                                                                                                                 | a. None                                 | 11       |       |
|                                                                                                                                                                         | b. Slight                               | 08       |       |
|                                                                                                                                                                         | c. Moderate                             | 05       |       |
|                                                                                                                                                                         | d. Severe                               | 00       |       |
| 2. Support                                                                                                                                                              |                                         |          |       |
|                                                                                                                                                                         | a. None                                 | 11       |       |
|                                                                                                                                                                         | b. Cane for long walks                  | 07       |       |
|                                                                                                                                                                         | c. Cane most of the time                | 05       |       |
|                                                                                                                                                                         | d. One crutch                           | 03       |       |
|                                                                                                                                                                         | e. Two canes                            | 02       |       |
|                                                                                                                                                                         | f. Two crutches                         | 00       |       |
|                                                                                                                                                                         | g. Not able to walk                     | 00       |       |
| 3. Distance walked                                                                                                                                                      |                                         |          |       |
|                                                                                                                                                                         | a. Unlimited                            | 11       |       |
|                                                                                                                                                                         | b. 6 blocks                             | 08       |       |
|                                                                                                                                                                         | c. 2-3 blocks                           | 05       |       |
|                                                                                                                                                                         | d. Indoors only                         | 02       |       |
|                                                                                                                                                                         | e. Bed and chair                        | 00       |       |
| B. Activities (14 possible)                                                                                                                                             |                                         |          |       |
| 1. Stairs                                                                                                                                                               |                                         |          |       |
|                                                                                                                                                                         | a. Normally without using a railing     | 04       |       |
|                                                                                                                                                                         | b. Normally using a railing             | 02       |       |
|                                                                                                                                                                         | c. In any manner                        | 01       |       |
|                                                                                                                                                                         | d. Unable to do stairs                  | 00       |       |
| 2. Shoes and Socks                                                                                                                                                      |                                         |          |       |
|                                                                                                                                                                         | a. With ease                            | 04       |       |
|                                                                                                                                                                         | b. With difficulty                      | 02       |       |
|                                                                                                                                                                         | c. Unable                               | 00       |       |
| 3. Sitting                                                                                                                                                              |                                         |          |       |
|                                                                                                                                                                         | a. Comfortably in chair for one hour    | 05       |       |
|                                                                                                                                                                         | b. On high chair for one half hour      | 03       |       |
|                                                                                                                                                                         | c. Unable to sit comfortably in a chair | 00       |       |
| 4. Enter public transportation                                                                                                                                          |                                         | 01       |       |
| <b>III Absence of deformity point (4) are given if the patient demonstrated</b>                                                                                         |                                         |          |       |
| A. Less than 30° fixed flexion contracture                                                                                                                              |                                         |          |       |
| B. Less than 10° fixed adduction                                                                                                                                        |                                         |          |       |
| C. Less than 10° fixed internal rotation in extension                                                                                                                   |                                         |          |       |
| D. Limb length discrepancy less than 3.2 centimetres                                                                                                                    |                                         |          |       |
| <b>IV Range of motion (index values are determined by multiplying the degrees of motion possible in each arc by the appropriate index</b>                               |                                         |          |       |
| A. Flexion                                                                                                                                                              |                                         |          |       |
|                                                                                                                                                                         | a.                                      | 0-45°    | x 1.0 |
|                                                                                                                                                                         | b.                                      | 45-90°   | x 0.6 |
|                                                                                                                                                                         | c.                                      | 90-110°  | x 0.3 |
| B. Abduction                                                                                                                                                            |                                         |          |       |
|                                                                                                                                                                         | a.                                      | 0-15°    | x 0.8 |
|                                                                                                                                                                         | b.                                      | 15-20°   | x 0.3 |
|                                                                                                                                                                         | c.                                      | Over 20° | x 0   |
| C. External rotation in extension                                                                                                                                       |                                         |          |       |
|                                                                                                                                                                         | a.                                      | 0-15°    | x 0.4 |
|                                                                                                                                                                         | b.                                      | Over 15° | x 0   |
| D. Internal rotation in extension                                                                                                                                       |                                         |          |       |
|                                                                                                                                                                         | a.                                      | Any      | x 0   |
| E. Adduction                                                                                                                                                            |                                         |          |       |
|                                                                                                                                                                         | a.                                      | 0-15°    | x 0.2 |
| To determine the overall rating for range of motion, multiply the sum of the index values x 0.05. Record Trendelenburg test as positive, level or neutral.              |                                         |          |       |
